# Supplementary material
Source: PubMed Central journal article supplement (PMC6146815)
Supplement: zjv019183888s1.pdf [file zjv019183888s1.pdf]

## Supplemental Movie Legends

S1 Movie. Cryotomogram of a field of IBDV E1 particles

S2 Movie. Cryotomogram of a field of IBDV E5 particles
